---

1                   **Suppression of Inflammation Delays Hair Cell**  
2                   **Regeneration and Functional Recovery Following**  
3                   **Lateral Line Damage in Zebrafish Larvae**

4                   Ru Zhang<sup>2,3</sup>, Xiao-Peng Liu<sup>3,4</sup>, Ya-Juan Li<sup>2</sup>, Ming Wang<sup>1,3</sup>, Lin Chen<sup>1,3\*</sup>,  
5 Bing Hu<sup>1,2\*</sup>

6  
7                   1 CAS Key Laboratory of Brain Function and Diseases, School of Life  
8                   Sciences, University of Science and Technology of China, Hefei 230027,  
9                   China.

10                  2 Lab of Neurodevelopment and Repair, University of Science and  
11                  Technology of China, Hefei 230027, China.

12                  3 Auditory Research Laboratory, University of Science and Technology of  
13                  China, Hefei 230027, China.

14                  4 Center for Hearing and Deafness, State University of New York at Buffalo,  
15                  NY14214, USA.

16

17

18

19                  \***Corresponding authors.**

20                  Bing Hu, PhD, Lab of Neurodevelopment and Repair, University of Science  
21                  and Technology of China, Hefei 230027, China.

22                  Tel.: +86 (551) 6360-2489

23                  E-mail: bhu@ustc.edu.cn

24                  Lin Chen, PhD, Auditory Research Laboratory, University of Science and  
25                  Technology of China, Hefei 230027, China.

26                  Tel.: +86 (551) 6360-7623

27                  E-mail: linchen@ustc.edu.cn

28

29 **Abstract:**

30 **Background:** Human cochlear hair cells cannot regenerate after loss. In  
31 contrast, those in fish and amphibians have a remarkable ability to regenerate  
32 after damaged. Previous studies focus on mechanisms of hair cell  
33 regeneration, such as Wnt and Notch signals. These studies ignore the fact  
34 that the beginning of regeneration is accompanied by a large number of  
35 inflammatory responses. The role of this inflammation in hair cell regeneration  
36 is still unknown. In addition, there is no appropriate behavioral method to  
37 quantitatively evaluate the functional recovery of lateral line hair cells after  
38 regeneration.

39 **Results:** In this study, we found that when inflammation was suppressed, the  
40 regeneration of lateral line hair cells and the recovery of the rheotaxis of the  
41 larvae were significantly delayed. Calcium imaging showed that the function of  
42 the neuromasts in the inflammation-inhibited group was weaker than that in the  
43 non-inflammation-inhibited group at the Early Stage of regeneration, and  
44 returned to normal at the Late Stage. Calcium imaging also revealed the cause  
45 of the mismatch between the function and quantity during regeneration.

46 **Conclusions:** Our results, meanwhile, suggest that suppressing  
47 inflammation delays hair cell regeneration and functional recovery when hair  
48 cells are damaged. This study may provide a new idea for how to promote hair  
49 cell regeneration and functional recovery in adult mammals.

50

51

52 **Keywords:** inflammation, hair cell regeneration, neuromast, lateral line,  
53 zebrafish larva, rheotaxis, calcium imaging.

54

55

## 56 **Background:**

57 Deafness and hearing defects are usually caused by loss of sensory hair  
58 cells or defect of auditory function. The loss of hair cells is result of aging,  
59 infection, genetic factors, hypoxia, autoimmune disorder, ototoxic drugs or  
60 noise exposure. Unfortunately, including humans, hair cells cannot regenerate  
61 in mammals (Oesterle and Stone, 2008; Yorgason. et al., 2006). In contrast,  
62 hair cells in some non-mammalian vertebrates have a remarkable ability to  
63 regenerate, such as birds, reptiles, amphibians and fish (Matsui. and  
64 Cotanchea., 2004; Popper and Hoxter, 1984; Stone. and Rubel., 2000). It  
65 could suggest that if we figure out the mechanism of hair cell regeneration in  
66 these species, we probably can promote hair cell regeneration in mammals.

67 When hair cells are damaged, support cells proliferate into both hair cells  
68 and support cells, or convert into hair cells directly(Baird et al., 1996;  
69 Lopez-Schier and Hudspeth, 2006; Raphael, 1992; Roberson et al., 2004).  
70 Hair cell regeneration is finely regulated by the interaction of multiple signaling  
71 pathways, such as Notch signaling(Ma et al., 2008; Mizutari et al., 2013),  
72 Wnt/b-catenin signaling(Aman and Piotrowski, 2008; Chai et al., 2012; Shimizu  
73 et al., 2012), Fgf signaling(Aman and Piotrowski, 2008; Nechiporuk and Raible,  
74 2008), retinoic acid(Rubbini et al., 2015) and so on. In the process of hair cell  
75 damaged, it is accompanied by a lot of inflammatory reaction, which has been  
76 found to play a role in tissue regeneration in recent years(Mescher, 2017). For  
77 example, macrophages are considered having main function in the  
78 inflammatory resolution stage and being required for fin regeneration(Li et al.,  
79 2012) and hair cell regeneration in zebrafish(Carrillo et al., 2016). In addition, it  
80 has been confirmed that neutrophils in mice play a central role in  
81 inflammation-induced optic nerve regeneration(Kurimoto et al., 2013).

82 In recent years, zebrafish (*Danio rerio*) has become an ideal model for  
83 studying inflammation and hair cell regeneration because it has conservative

84 innate immunity (Renshaw and Trede, 2012) and strong regeneration ability in  
85 lateral line system(Lush and Piotrowski, 2014) which makes zebrafish larvae  
86 to perceive the change of surrounding flow, detect their prey and avoid  
87 predators(Coombs. et al., 2014; Dijkgraaf, 1962). The lateral system of a larva  
88 is composed of neuromasts which located on the surface of the body.  
89 The neuromasts on the head consist of the anterior lateral line system (aLL)  
90 and the ones along the body comprise the posterior lateral line system  
91 (pLL)(Thomas et al., 2015). The center of the neuromast is composed of hair  
92 cells and they are surrounded by support cells and mantle cells. At the top of  
93 the hair cells, rows of short stereocilia and a long kinocilium extend out of the  
94 body called the hair bundle and are covered in a gelatinous cupula. The  
95 arrangement of stereocilia and kinocilium determines the polarity of hair cells  
96 and the polarity of the hair cells is planar cell polarity (PCP), which is arranged  
97 symmetrically (Flock and Wersall, 1962), half in each direction.

98       When hair bundles are deflected, hair cells release transmitters and cause  
99 exciting spikes in afferent neurons(Dijkgraaf, 1962). And then, larvae show a  
100 robust behavior called rheotaxis(Olszewski et al., 2012). This behavior can be  
101 applied to evaluate the function of hair cells (Suli et al., 2012).

102       In recent years, calcium imaging has become a popular method to  
103 measure the function of neural cells in detail and quantitatively (Zhang et al.,  
104 2016). When the mechanical hair bundle deflected, calcium and other cations  
105 enter into cytoplasm through mechanotransduction channels. It changes the  
106 membrane potential and activates voltage-gated calcium channels which allow  
107 rapid calcium inflow to trigger synaptic transmission. GCaMPs, a  
108 genetically-encoded calcium indicator(GECIs), are single fluorescent proteins,  
109 which can bind calcium directly and alter conformation to respond the change  
110 of calcium concentration(Tian et al., 2012). These significant,  
111 activity-dependent signals can reflect the function of hair cells in a single

112 neuromast (Zhang et al., 2018; Zhang et al., 2016).

113 Previous research has found that the deletion of macrophages by  
114 morpholino leads to the delay of hair cell regeneration(Carrillo et al., 2016).  
115 However, does it still cause the delay of hair cell regeneration when the  
116 macrophages are intact, and the pro-inflammatory factors are suppressed as  
117 the hair cells are damaged? Is there any delay in the functional recovery of the  
118 lateral line?

119 In order to figure out the above problems, we used an anti-inflammatory  
120 agent, BRS-28, to suppress the inflammation when hair cells are damaged by  
121 copper. BRS-28 is a derivative of 5 $\alpha$ -cholestan-6-one, which was confirmed to  
122 be a remarkably suppressor of the production of pro-inflammatory factors,  
123 such as NO, TNF- $\alpha$ , IL-1 $\beta$ , iNOS and cox-2(Yang et al., 2014). We count the  
124 number of neutrophils and macrophages in Tg(corola-eGFP; lyz-Dsred)  
125 transgenic line. Then, AB/WT zebrafish larvae were used to count the number  
126 of regenerated hair cells. Since there is no appropriate behavioral method to  
127 quantitatively evaluate the function of lateral line hair cells, we designed and  
128 built devices to test rheotaxis behavior in AB/WT larvae. A behavioral analysis  
129 software was applied for quantitative evaluation of rheotaxis, so as to reflect  
130 the holistic functional recovery of the posterior lateral line. Finally, the function  
131 of the regenerated hair cells in a single neuromast was evaluated by the  
132 method of calcium imaging in Huc:h2b-gcamp6f transgenic line.

133

## 134 **Results**

### 135 **CuSO<sub>4</sub> damaged hair cells in lateral line of zebrafish.**

136 Sensory hair cells in a 6-day post fertilization (dpf) AB/WT zebrafish larva  
137 were labeled with 0.05% DASPEI clearly (**Fig. 1A**). L2、LII2、L3 neuromasts  
138 (circles in **Fig.1 A**) were three of the posterior lateral neuromasts, which

---

139 located along the flat truck body and easily to be observed. A lateral view of the  
140 neuromasts showed the elongated kinocilia extending from the body (**Fig. 1B**).  
141 The neuromasts are consisted of hair cells surrounded by support cells, which  
142 are surrounded by mantle cells (**Fig. 1C**). In order to study the effects of  
143 inflammation on hair cell regeneration, we established a hair-cell-damaged  
144 model. Hair cells were damaged completely, when treated with 5  $\mu\text{M}$   $\text{CuSO}_4$   
145 for 1 h (**Fig. 1D**). Labeled with 0.05% DASPEI, hair cells displayed close  
146 arrangement and clear boundary. Only treated with  $\text{CuSO}_4$  solution for 20 min,  
147 hair cells became loose and unclear which suggested that they were already  
148 injured. The number of hair cells decreased with weaker fluorescence intensity  
149 and obscure cell boundary at 40 min. Hair cells were completely disappeared  
150 at 60 min, indicating that they had been completely damaged. TUNEL assay  
151 revealed the missing hair cells underwent apoptosis (**Supplementary Fig. 1**).  
152 After being transferred to embryo medium (EM), the number of hair cells  
153 quickly returned to normal (**Fig. 1E**).

154 **BRS-28 reduced the number of neutrophils and macrophages migrating**  
155 **to the injured neuromasts.**

156 Neutrophils (**Fig. 2B, C**, blue arrows) and macrophages (**Fig. 2B, C**, white  
157 arrows) could be marked and distinguished in larvae of Tg(*corola-eGFP*;  
158 *lyz-Dsred*) transgenic line (**Supplementary Fig. 2**). Normally, neutrophils and  
159 macrophages were almost absent from the neuromasts (example, **Fig. 2A**).  
160 When treated with  $\text{CuSO}_4$  solution, hair cells were damaged. Neutrophils and  
161 macrophages migrated to neuromasts within 1 hours (example, **Fig. 2B**).  
162 When larvae were immersed in BRS-28, an anti-inflammatory agent, before  
163 treated with  $\text{CuSO}_4$  solution, less neutrophils and macrophages migrated to  
164 the damaged neuromasts (example, **Fig. 2C**). When the inflammation  
165 suppressed, the numbers of neutrophils appeared around the damaged  
166 neuromasts were lower at 0.5,1,3 and 4 h after add the  $\text{CuSO}_4$  solution in

---

167 BRS+CuSO<sub>4</sub> group than in CuSO<sub>4</sub> group (**Fig. 2D**). In addition, we observed  
168 BRS+CuSO<sub>4</sub> group had fewer macrophages at 0.5, 1, 2 and 3 h than CuSO<sub>4</sub>  
169 group (**Fig. 2E**). Collectively, the data strongly suggested that BRS-28 reduced  
170 the number of neutrophils and macrophages migrating to the injured  
171 neuromasts. It was worth noting that compared with control, there was no  
172 significant difference in the numbers of neutrophils and macrophages between  
173 CuSO<sub>4</sub> group and BRS+CuSO<sub>4</sub> group at 5 and 6 h, indicating that the  
174 inflammation was resolved.

### 175 **Suppressing inflammation delayed hair cell regeneration.**

176 In order to investigate whether the regeneration of hair cells were delayed  
177 after suppressing inflammation, we observed hair cells in the L2, LII2 and L3  
178 neuromasts. We found that the regeneration of hair cells was delayed after the  
179 inflammation was suppressed by the inflammatory inhibitor, BRS-28. Live  
180 imaging showed regenerated hair cells in CuSO<sub>4</sub>, BRS+CuSO<sub>4</sub> group at 24, 48  
181 and 96 hours post injured (hpi) by CuSO<sub>4</sub>(**Fig. 3A**). Control group was showed  
182 at the same time point. Further analysis revealed that the numbers of  
183 regenerated hair cells were significantly decreased in BRS+CuSO<sub>4</sub> group than  
184 that in CuSO<sub>4</sub> group at 16 hpi (P=0.0061), 24 hpi (P=0.0021) and 48 hpi  
185 (P<0.0001) (**Fig. 3B**, n = 30 neuromasts). These results indicated that the  
186 regeneration of hair cells was delayed in BRS+CuSO<sub>4</sub> group within 48 hpi.  
187 Compared with Control group, there was no difference in the number of hair  
188 cells between CuSO<sub>4</sub> group and BRS+CuSO<sub>4</sub> group at 96 hpi, suggesting that  
189 hair cells were regenerated to the normal level at 96 hpi. We also analyzed the  
190 number of hair cells when only teated with BRS-28 (BRS group). As expected,  
191 BRS group had no difference with Control group at any time point, excluding  
192 the effect of BRS-28 on hair cells.

193 Since hair cells did not regenerate at a uniform rate, we defined the time  
194 of regeneration into two periods: the Early Stage which includes the time from

---

195 0 to 48 hpi and the Late Stage which includes the time after 48 hpi. The  
196 regeneration of hair cells was fast in the Early Stage and slow in the Late Stage.  
197 Linear analysis was conducted on the number of hair cell regeneration in the  
198 Early Stage. The slope in CuSO<sub>4</sub> group (0.1879) was higher than that in  
199 BRS+CuSO<sub>4</sub> group (0.148) , meanwhile, x-intercept in CuSO<sub>4</sub> group (4.16)  
200 was higher than that in BRS+CuSO<sub>4</sub> group (8.287) (**Fig. 3C, D**). These implied  
201 that the hair cell regeneration in BRS+CuSO<sub>4</sub> group may begin later and  
202 slower than that in CuSO<sub>4</sub> group.

203 To explore whether the time window of inflammatory suppression had  
204 contribute to delayed regeneration, we changed the start time of BRS-28  
205 treatment. We found that compared with the CuSO<sub>4</sub> group, whether BRS-28  
206 was added at the same time as CuSO<sub>4</sub> (CuSO<sub>4</sub>+BRS 0 h group), or 30 minutes  
207 after the addition of CuSO<sub>4</sub> (CuSO<sub>4</sub>+BRS 0.5 h group), or 1 hour after the  
208 addition of CuSO<sub>4</sub>(CuSO<sub>4</sub>+BRS 1 h group) (**Fig. 3E**), there was no statistical  
209 difference on the number of regenerated hair cells.

210 To sum up, the regeneration of hair cells in lateral line was delayed after  
211 the inflammation was suppressed by the inflammatory inhibitor BRS-28.

212 **The functional recovery of the lateral line system was delayed when**  
213 **inflammation was suppressed.**

214 Since the rheotaxis could reflect the function of the lateral line, we  
215 designed a behavioral device to test the rheotaxis of zebrafish (**Fig. 4A**, see  
216 details in Materials and Methods). Larvae were placed from the right platform,  
217 and they sense the water flow from right to left. **Figure 4B, C** were two  
218 examples of larval rheotaxis processed by behavioral analysis software: the  
219 former was a larva with excellent rheotaxis(**Fig. 4B**) and the latter was a larva  
220 performed failure in the rheotaxis test(**Fig. 4C**). The left panels in these two  
221 examples showed the track of this larva. The behavioral analysis software  
222 mapped the movement path of larvae by line segment. The color of the line



---

223 segment represented the direction of movement of the larvae. All the  
224 movements from right to left were represented by purplish or red segments,  
225 where purple indicated that the velocity along the flow direction was greater  
226 than or equal to the flow velocity, and red indicated that the velocity along the  
227 flow direction was less than the flow velocity. All the movements from left to  
228 right were represented by green segments, and the higher the brightness was,  
229 the faster the speed was. The right panels displayed the motion vector. The  
230 lengths of the blue segments represented the distance of each movement, and  
231 the direction of the blue segment represented the direction of that movement.  
232 The length of the red line segment was the ratio of motion vectors sum to the  
233 motion arithmetic sum and the direction was the direction of the sum of the  
234 vectors.

235       When the red segment was long and had a small angle of 0 degree, it  
236 indicated that the motion of the larva was consistent with the opposite direction  
237 of flow. It represented that the larva had good rheotaxis, indicating its lateral  
238 line system had good function. Therefore, the software reported a high score.  
239 On the contrary, when the red segment was short or had a small angle of 180  
240 degree, it indicated that the larva moved randomly and had a poor rheotaxis,  
241 indicating its lateral line system had poor function. In this case, the software  
242 reported a low score. The scores reported by the software were plotted into bar  
243 charts and showed in **Figure 4D**. After the hair cells were damaged by  $\text{CuSO}_4$ ,  
244 there was little rheotaxis in both  $\text{CuSO}_4$  group and  $\text{BRS}+\text{CuSO}_4$  group. At 24  
245 and 48 hpi, the rheotaxis of  $\text{BRS}+\text{CuSO}_4$  group was significantly lower than  
246 that of control. On the contrary, the rheotaxis of  $\text{CuSO}_4$  group was not  
247 significantly different from that of control within 24 hpi. Therefore, it indicated  
248 that the functional recovery of lateral line system was delayed in  $\text{BRS}+\text{CuSO}_4$   
249 group. The rheotaxis of BRS group at each time point was not different from  
250 that of control, suggesting that BRS-28 had no significant effect on the

---

251 rheotaxis. In addition, we noted that the speed and distance of each  
252 movements were consistent within different times and between different  
253 groups: both were stable at around 22 mm/s (**Fig. 4E, F**), which indicated that  
254 BRS-28 or CuSO<sub>4</sub> did not affect the movement of zebrafish.

255 The conclusion was that the regenerated hair cells still had the ability to  
256 sense water flow, but the functional recovery of lateral line system was delayed  
257 when inflammation was suppressed.

### 258 **Calcium imaging revealed the function of a single neuromast after hair** 259 **cell regeneration**

260 Since we found a mismatch between the function of the lateral line and the  
261 amount of hair cell regeneration, that is, after the zebrafish lateral line was  
262 damaged by copper sulfate, it took 96 h for the hair cells to return to normal,  
263 while the flow ability returned to normal at 24 h. The function of a single  
264 neuromast can be evaluated by observing its calcium activity (Zhang et al.,  
265 2016). The L3 neuromast, located in flat trunk, was stimulated by water flow  
266 from an electrode (**Fig. 5A**). Since hair cells had polarities, the yellow and  
267 green hair cells represented opposite polarities. Chou et al. reported that the  
268 polarity of the L3 neuromast is parallel to the anterior-posterior body axis (Chou  
269 et al., 2017). Thus, by adjusting the direction of the electrode, water was  
270 controlled to flow in two directions: anterior to posterior (A-P) direction or  
271 posterior to anterior (P-A) direction. We found that not all hair cells responded  
272 to the water flow, and only some hair cells were active (example, **Fig. 5B**,  
273 circled cells). These active cells only responded to stimulus in one direction:  
274 P-A direction (**Fig. 5C**, yellow ones and yellow circles in **Fig. 5B**) or A-P  
275 direction (**Fig. 5D**, green ones and green circles in **Fig. 5B**). Because the  
276 neuromasts were stereoscopic, some of the active hair cells were far from this  
277 focal plane (dashed circles in **Fig. 5B**) and were not included in subsequent  
278 fluorescence intensity analysis.

279 Similar to the results of the rheotaxis, the fluorescence intensity( $\Delta F/F$ ) of  
280 the regenerated hair cells were reduced significantly when inflammation was  
281 suppressed at the Early Stage of regeneration (within 48 hpi)(**Fig. 5E**). It was  
282 noteworthy that compared to control group, the fluorescence intensity in  
283  $\text{CuSO}_4$  group did not decrease significantly in the Early Stage of regeneration.  
284 This might explain that why the rheotaxis in  $\text{CuSO}_4$  group had been recovered  
285 at 24 hpi. The fluorescence intensity of BRS+ $\text{CuSO}_4$  group was not  
286 significantly different from that of control group and  $\text{CuSO}_4$  group in the Late  
287 Stage of regeneration (72-96 hpi) (**Fig. 5F**). Additionally, the fluorescence  
288 intensity showed no differences between BRS group and control group (**Fig.**  
289 **5G**), indicating that BRS-28 had no effect on the fluorescence intensity.

290 Normally, only a part of the hair cells in the neuromast responds to the  
291 stimulation of water flow. Is it the same for regenerated hair cells? We found  
292 that only a few regenerated hair cells in  $\text{CuSO}_4$  group and BRS+ $\text{CuSO}_4$  group  
293 responded to flow stimuli. The number of active cells in each neuromast in  
294 these two group were approximately the same at 24 to 96 hpi, and were  
295 consistent with that in control group (**Fig. 5H**).

296 Furthermore, we noticed that most hair cells that responded to the flow in  
297 the opposite direction came in pairs (**Supplementary Fig. 3A**). Although the  
298 numbers of hair cells responding to flow in P-A direction were similar to that in  
299 A-P direction, the fluorescence intensity of hair cells responding to P-A  
300 direction was significantly higher than that of hair cells responding to A-P  
301 direction (**Supplementary Fig. 3B**). It indicated that L3 neuromast was more  
302 sensitive to the flow from the P-A direction.

303 The results demonstrated that the recovery of hair cell function was  
304 delayed at the Early Stage of regeneration when inflammation was  
305 suppressed.

306

---

## 307 Discussion

### 308 **BRS-28 suppresses inflammation and delays the initiation of hair cell** 309 **regeneration.**

310 Although the downregulation of Notch signal during lateral line  
311 regeneration induces the proliferation of support cells by activating  
312 Wnt/b-Catenin signal (Romero-Carvajal et al., 2015), it is still unknown how the  
313 downregulation of Notch signal is triggered after the death of hair cells. Kniss  
314 and his colleague proposed a hypothesis of triggering hair cell regeneration in  
315 2016 (Kniss et al., 2016). They believed that apoptosis initiated the  
316 proliferation of peripheral cells to promote tissue repair (Fan and Bergmann,  
317 2008; Mollereau et al., 2013) and they called this process as compensatory  
318 proliferation. They assumed that a similar process may be involved in the  
319 regeneration of hair cells. On the basis of their hypothesis, we speculate that  
320 when hair cells are damaged by CuSO<sub>4</sub>, it cause apoptosis in lateral line hair  
321 cells, trigger the rise of reactive oxygen species (ROS) and reactive nitrogen  
322 species (RNS), and induce the oxidative stress. This process may improve  
323 AP-1, HIF-1 $\alpha$  and NF- $\kappa$ B activity, and thus increase pro-inflammatory cytokines  
324 and chemokines, such as NO, IL-1 $\beta$ , TNF- $\alpha$ , cox-2, iNOS and so on (Pereira et  
325 al., 2016). BRS-28, suppress the production of NO, IL-1 $\beta$ , TNF- $\alpha$ , cox-2, iNOS  
326 (Yang et al., 2014), reducing the number of neutrophils and macrophages  
327 migrating to the damage of neuromasts. Besides that, the decrease of  
328 pro-inflammatory factors may reduce the activation of macrophages. These  
329 processes would decrease the production of TNF ligands and inhibit the JNK  
330 signal, which contributes to initiating cells regeneration, and eventually leads  
331 to delay initiation of compensatory proliferation and delay regeneration of hair  
332 cells.

333 When the initiate time of inflammatory inhibitors changed, there is no  
334 delay in the amount of regeneration. This also suggests that the timing of

335 inflammation suppression is important: when inflammation occurs,  
336 compensated proliferation of the support cells has been triggered and hair cell  
337 regeneration has been initiated. If inflammation suppression does not take  
338 effect, regeneration seems to be unaffected.

339 In addition, neutrophils can also remove dead cell debris, and  
340 macrophages can absorb apoptotic neutrophils or fragments of dead cells. We  
341 suggest that neutrophils and macrophages with reduced number and activity  
342 become slow in cleaning up damaged tissue areas, so as to have a good  
343 regeneration environment. Since the damaged neuromasts need more time to  
344 clean up these cell fragments, it may also delay the regeneration of hair cells.

345 **Suppression of inflammation delays functional recovery of regenerated**  
346 **hair cells**

347 In this study, we have found that the number of hair cells decreased when  
348 inflammation was suppressed which is the same as the functional recovery.  
349 Finally, the quantity and the function of hair cells will be consistent with the  
350 recovery of the normal level. Therefore, although the suppression of  
351 inflammation delayed the regeneration of hair cells, it did not affect the overall  
352 process of hair cell regeneration, and the function of hair cells regenerated in  
353 the state of low inflammation eventually tended to be intact. These phenomena  
354 are also consistent with the hypothesis I mentioned earlier. However, the effect  
355 of inflammation on the regeneration of lateral hair cells seems to be different  
356 from that of the fin. In 2012, Li and his colleague found that when zebrafish  
357 larvae lacked macrophages, vacuoles appeared in the regenerated fin, which  
358 suggests that macrophages may also be involved in the regeneration of the fin.  
359 In our research, although the suppression of inflammation has delayed hair cell  
360 regeneration and its recovery of function at the Early Stage of regeneration,  
361 they eventually return to the normal status at the Late Stage of regeneration.  
362 This is not because inflammation is not suppressed sufficiently, as Carrillo et al.

---

363 found in their study that the number of hair cells finally completed regeneration  
364 even when macrophages was knockout(Carrillo et al., 2016). But that, this may  
365 be because the injured organs are different, and the intact function of lateral  
366 hair cells is crucial for the survival of zebrafish. We suggest that the hair cells  
367 in lateral line may have more complex regulation in regeneration.

368 **The functional recovery of hair cells is much faster than its quantity**

369 Previous studies have focused on the morphological and quantitative  
370 recovery of regenerated hair cells in zebrafish (Carrillo et al., 2016;  
371 Romero-Carvajal et al., 2015). Since the regeneration takes 3-4 days post  
372 injured, it is easy to assume that the recovery of the function of the neuromasts  
373 may be proportional to the number of regenerated hair cells. In this study, for  
374 the first time, we performed a method for evaluating the function of  
375 regenerated hair cells. We found that the CuSO<sub>4</sub> group already performed  
376 excellent rheotaxis at 24 hpi (Fig. 4 C), although the average number of hair  
377 cells was only 3.667 at that time (Fig. 3 B). Thus, the functional recovery of hair  
378 cells is much faster than its quantity. In other words, although it takes 72-96 h  
379 to complete regeneration, the function of hair cells can be recovered at 24 h. It  
380 is critical to the survival of zebrafish. When BRS-28 is used to suppress the  
381 inflammation, the amplitude of calcium activity of hair cells was significantly  
382 lower than not only that of control group but that of CuSO<sub>4</sub> group which makes  
383 larvae show poor rheotaxis at the Early Stage of regeneration. Therefore, the  
384 suppression of inflammation not only delays the hair cell regeneration, but also  
385 delays the functional recovery.

386 We noticed that there is a mismatch between the function and quantity  
387 during regeneration. Calcium image has revealed that only a part of hair cells  
388 in one neuromast respond to the flow. This result is consistent with previous  
389 study(Zhang et al., 2018). We have found that this phenomenon also exists in  
390 regeneration group (CuSO<sub>4</sub> and BRS+CuSO<sub>4</sub> group). No matter what the

---

391 amount of regenerated hair cells is, the number of hair cells responding to the  
392 flow remained stable during regeneration and has no differences with that of  
393 the controls (Fig5 H). Besides that, the magnitude of fluorescence intensity  
394 and reaction time is also consistent with that of the controls. This explains  
395 why the number of regeneration in the CuSO<sub>4</sub> group at 24 h is only 3.667 on  
396 average, but the function of the lateral line has been restored to the level very  
397 close to that of the control group.

398 In this study, We only performed calcium imaging on the L3 neuromast,  
399 which was confirmed as the polarity of the A-P body axis in the study of Chou  
400 et al(Chou et al., 2017). Consistent with their results, we also found this  
401 neuromast is insensitive to the flow in the dorsal-ventral (D-V) body axis.  
402 Therefore, this study only focused on the stimulus response in the direction of  
403 the A-P body axis, and did not further analyze the stimulus data of the D-V  
404 body axis. We have observed that most of hair cells that responded to the flow  
405 from the direction P to A were more active than that from A to P (Fig5 J; sample,  
406 Fig5 C,D) and that those responded to the opposite flow came in pairs(Fig 5 I).  
407 All these suggest that it looks like being arranged beforehand rather than at  
408 random though only a part of cells in one neuromast responded to flow  
409 stimulation.

410 In summary, our research suggests that suppression of inflammation  
411 delays functional regeneration of lateral hair cells in zebrafish larvae. The  
412 inflammation plays positive and permissive roles in regeneration of hair cells.

413

## 414 **Materials and Methods**

### 415 **Zebrafish strains and maintenance**

416 AB/Wild-type strain, Tg(corola-eGFP;lyz-Dsred) and Huc:h2b-gcamp6f  
417 transgenic line were used in this study. Embryos were generated by paired  
418 mating and maintained at 28.5°C in EM and on a 14/10 h light/dark cycle

419 according to the standard protocols.

420 All animal manipulations were conducted strictly in accordance with the  
421 guidelines and regulations set forth by the University of Science and  
422 Technology of China (USTC) Animal Resources Center and the University  
423 Animal Care and Use Committee. The protocol was approved by the  
424 Committee on the Ethics of Animal Experiments of the USTC (Permit Number:  
425 USTCACUC1103013).

#### 426 **Hair cell damage and inflammation inhibition**

427 In order to damage hair cells in lateral line, 4 dpf Larvae were treated with  
428 5  $\mu\text{M}$   $\text{CuSO}_4$  (Sangon, China) diluted in embro medium (EM) for 1 h. Then, they  
429 were washed three times and recovered in EM.

430 To suppress inflammation, 4 dpf larvae were immersed in 0.1% BRS-28,  
431 an anti-inflammatory agent, for 3 h before being moved into  $\text{CuSO}_4$  to damage  
432 hair cells.

#### 433 **Live imaging**

434 AB/Wild-type larvae were used to count the number of regenerated hair  
435 cells in L2、LII2、L3 neuromasts (Fig. 1A). Hair cells were marked by  
436 0.01 % DAPI for 5 minutes. Being anesthetized in 0.02% MS-222 (Tricaine  
437 mesylate, Sigma, USA), larvae were imaged under a fluorescence microscope  
438 (Olympus BX-60, Japan).

439 In order to exhibit the damage of hair cells in copper sulfate solution and  
440 the regeneration of hair cell in different phases, hair cells were labeled by  
441 0.05 % DASPEI (Sigma, USA), and larvae were anesthetized in MS-222 and  
442 imaged under a confocal microscopy (Zeiss LSM 880 +Airyscan, Germany).

443 Tg(corola-eGFP; lyz-Dsred) transgenic line was used to observe the  
444 number of neutrophils and macrophages migrating to the injured neuromasts  
445 *in vivo*. This transgenic line expressed the enhanced green fluorescent protein  
446 (eGFP) in macrophages and expressed both eGFP and Dsred in neutrophils,



447 which shows yellow fluorescent when merged. To show the neutrophils and  
448 macrophages migrating to damaged neuromasts, larvae were anesthetized in  
449 MS-222 and imaged under a confocal microscopy (Zeiss LSM 880 +Airyscan).  
450 For neutrophils and macrophages counting, we determined the area within 100  
451  $\mu\text{m}$  around the L2、LII2、L3 neuromasts as the target. Zebrafish larvae were  
452 anesthetized and imaged by the fluorescence microscope (Olympus BX-60)  
453 with a green and a red channel.

#### 454 **Rheotaxis behavior experiments**

455 A U-shaped tank was designed to test the rheotaxis behavior of larvae  
456 (Fig 4A). The bottom of the two cubic tanks (7 cm length \*8 cm width\*8 cm  
457 height) were connected by a platform (10 cm length \*8 cm width\*0.5 cm height).  
458 A peristaltic pump (Longer Pump YZ1515x,China) was used to move EM  
459 solution from the left tank to the right one, so that, a stable reverse flow was  
460 formed (right to left,  $v=10$  mm/s). AB/WT zebrafish larvae were applied to  
461 detect the ability of rheotaxis. Larvae were released at the right side of the  
462 platform with early velocity almost equals 0. To avoid visual cues, experiments  
463 were operated in the dark and rheotaxis performs were recorded by an infrared  
464 CCD (IR850, weixinshijie, China).

465 Rheotaxis data were analyzed by our own rheotaxis software edited in  
466 Matlab (2015a, MathWorks, USA). This software can plot the movement track  
467 of zebrafish larvae in the platform, measure the direction and distance of each  
468 swimming and calculate the speed of each movement. Finally, it reports scores  
469 based on the magnitude in the horizontal direction of the ratio of motion  
470 vectors sum to the motion arithmetic sum.

#### 471 **Calcium imaging and data analyses**

472 Huc: h2b-GCamp6f transgenic line was used in calcium imaging which  
473 expressed pan-neuronal nucleus-labelled GCamp6f. Larvae were  
474 anesthetized and fixed by a net pressure. The one-step pulled micropipette

---

475 had a long, wispy tip which must be trimmed by rubbing it against with another  
476 pulled micropipette to generate a tip with an outer diameter of approximately  
477 40  $\mu\text{m}$ . The micropipette was filled with MS-222 and fixed to the holder of a  
478 micromanipulator (MX7500, Scientific Design Company, USA). The tip of the  
479 micropipette should be positioned at a distance of approximately 100  $\mu\text{m}$  from  
480 the top of the kinocilia (Fig.5 A). The duration of flow was controlled by  
481 three direct links which were linked with a syringe.

482 Calcium imaging was collected by a confocal microscopy (FV 1000,  
483 Olympus, Japan). In order to make as many hair cells as possible in the  
484 observation area at the same time, a single z-axis was adjusted. Region of  
485 interest (ROI) was set to 110\*108. We took 100 time-lapse images for each  
486 neuromast, and the total capture time was 29.7 s (0.297 s per slice). Flow  
487 stimulation occurred at the period from 10.098 to 19.899 s.

488 Since the neuromasts are three-dimensional, different hair cells have  
489 different levels of fluorescence intensity. Namely, they have different levels of  $F$   
490 prime. The relative fluorescence intensity change ( $\Delta F/F_0$ ) is more commonly  
491 used. For each hair cell, the average fluorescence intensity before flow stimuli  
492 (0-10 s) was set as  $F_0$ . The data would be excluded when  $F_0 < 95$ , which means  
493 these hair cells were too far from the focal plane. If neuromasts had more than  
494 two hair cells that responded to the flow stimulus, we took only the two that  
495 responded the most in the fluorescence intensity change curve.

#### 496 **Statistical analysis**

497 All data were shown as mean  $\pm$  S.E.M. or as relative proportions of 100 % as  
498 indicated in the appropriate legends. The data were analyzed in either  
499 one-way ANOVA with Tukey's multiple comparisons test or two-way ANOVA  
500 with Tukey's multiple comparisons test by GraphPad Prism version 7.0 (Prism,  
501 San Diego, CA, USA). The level of significance was set to  $P < 0.05$ . \*, \*\* and  
502 \*\*\* represent  $P < 0.05$ ,  $P < 0.01$  and  $P < 0.001$ , respectively.

503

## 504 **Acknowledgments**

505 The authors thank Drs. Wen Zilong for providing the Tg(corola-eGFP;  
506 lyz-Dsred) transgenic fish line, Drs. Wen Quan for providing the  
507 Huc:h2b-gcamp6f transgenic fish line. The authors thank Drs. Zhen Xuechu for  
508 providing BRS-28 and the compound-26 in their study is the BRS-28  
509 mentioned in this study.

510

## 511 **References**

- 512 Aman, A., and Piotrowski, T. (2008). Wnt/beta-catenin and Fgf signaling control  
513 collective cell migration by restricting chemokine receptor expression. *Developmental*  
514 *cell* **15**, 749-761.
- 515 Baird, R.A., Steyger, P.S., and Schuff, N.R. (1996). Mitotic and nonmitotic hair cell  
516 regeneration in the bullfrog vestibular otolith organs. *Annals of the New York Academy*  
517 *of Sciences* **781**, 59-70.
- 518 Carrillo, S.A., Anguita-Salinas, C., Pena, O.A., Morales, R.A., Munoz-Sanchez, S.,  
519 Munoz-Montecinos, C., Paredes-Zuniga, S., Tapia, K., and Allende, M.L. (2016).  
520 Macrophage Recruitment Contributes to Regeneration of Mechanosensory Hair Cells in  
521 the Zebrafish Lateral Line. *Journal of cellular biochemistry* **117**, 1880-1889.
- 522 Chai, R., Kuo, B., Wang, T., Liaw, E.J., Xia, A., Jan, T.A., Liu, Z., Taketo, M.M., Oghalai,  
523 J.S., Nusse, R., *et al.* (2012). Wnt signaling induces proliferation of sensory precursors  
524 in the postnatal mouse cochlea. *Proceedings of the National Academy of Sciences of*  
525 *the United States of America* **109**, 8167-8172.
- 526 Chou, S.W., Chen, Z., Zhu, S., Davis, R.W., Hu, J., Liu, L., Fernando, C.A., Kindig, K.,  
527 Brown, W.C., Stepanyan, R., *et al.* (2017). A molecular basis for water motion detection  
528 by the mechanosensory lateral line of zebrafish. *Nature communications* **8**, 2234.
- 529 Coombs, S., Bleckmann, H., Fay, R.R., and Popper, A.N. (2014). *The Lateral Line*  
530 *System (New York: Springer).*
- 531 Dijkgraaf, S. (1962). The functioning and significance of the lateral-line organs.  
532 *Biological Reviews of the Cambridge Philosophical Society* **38**: 51-105.
- 533 Fan, Y., and Bergmann, A. (2008). Apoptosis-induced compensatory proliferation.  
534 *The Cell is dead. Long live the Cell! Trends in cell biology* **18**, 467-473.
- 535 Flock, A., and Wersall, J. (1962). A study of the orientation of the sensory hairs of  
536 the receptor cells in the lateral line organ of fish, with special reference to the function  
537 of the receptors. *The Journal of cell biology* **15**, 19-27.
- 538 Kniss, J.S., Jiang, L., and Piotrowski, T. (2016). Insights into sensory hair cell

- 539 regeneration from the zebrafish lateral line. *Current opinion in genetics & development*  
540 **40, 32-40.**
- 541 Kurimoto, T., Yin, Y., Habboub, G., Gilbert, H.Y., Li, Y., Nakao, S., Hafezi-Moghadam,  
542 A., and Benowitz, L.I. (2013). Neutrophils express oncomodulin and promote optic  
543 nerve regeneration. *The Journal of neuroscience : the official journal of the Society for*  
544 *Neuroscience* **33, 14816-14824.**
- 545 Li, L., Yan, B., Shi, Y.Q., Zhang, W.Q., and Wen, Z.L. (2012). Live imaging reveals  
546 differing roles of macrophages and neutrophils during zebrafish tail fin regeneration.  
547 *The Journal of biological chemistry* **287, 25353-25360.**
- 548 Lopez-Schier, H., and Hudspeth, A.J. (2006). A two-step mechanism underlies the  
549 planar polarization of regenerating sensory hair cells. *Proceedings of the National*  
550 *Academy of Sciences of the United States of America* **103, 18615-18620.**
- 551 Lush, M.E., and Piotrowski, T. (2014). Sensory hair cell regeneration in the zebrafish  
552 lateral line. *Developmental dynamics : an official publication of the American*  
553 *Association of Anatomists* **243, 1187-1202.**
- 554 Ma, E.Y., Rubel, E.W., and Raible, D.W. (2008). Notch signaling regulates the extent  
555 of hair cell regeneration in the zebrafish lateral line. *The Journal of neuroscience : the*  
556 *official journal of the Society for Neuroscience* **28, 2261-2273.**
- 557 Matsui, J.I., and Cotanche, D.A. (2004). Sensory hair cell death and regeneration  
558 two halves of the same equation. *Hearing Science.*
- 559 Mescher, A.L. (2017). Macrophages and fibroblasts during inflammation and tissue  
560 repair in models of organ regeneration. *Regeneration* **4, 39-53.**
- 561 Mizutari, K., Fujioka, M., Hosoya, M., Bramhall, N., Okano, H.J., Okano, H., and Edge,  
562 A.S. (2013). Notch inhibition induces cochlear hair cell regeneration and recovery of  
563 hearing after acoustic trauma. *Neuron* **77, 58-69.**
- 564 Mollereau, B., Perez-Garijo, A., Bergmann, A., Miura, M., Gerlitz, O., Ryoo, H.D.,  
565 Steller, H., and Morata, G. (2013). Compensatory proliferation and apoptosis-induced  
566 proliferation: a need for clarification. *Cell death and differentiation* **20, 181.**
- 567 Nechiporuk, A., and Raible, D.W. (2008). FGF-Dependent Mechanosensory Organ  
568 Patterning in Zebrafish. *Science* **320, 1774-1777.**
- 569 Oesterle, E.C., and Stone, J.S. (2008). Hair Cell Regeneration: Mechanisms Guiding  
570 Cellular Proliferation and Differentiation. In *Hair Cell Regeneration, Repair and*  
571 *Protection*, RJ Salvi , A. Popper, and R. Fay, eds. (New York: Springer), pp. 141-197.
- 572 Olszewski, J., Haehnel, M., Taguchi, M., and Liao, J.C. (2012). Zebrafish Larvae  
573 Exhibit Rheotaxis and Can Escape a Continuous Suction Source Using Their Lateral  
574 Line. *PloS one* **7, e36661.**
- 575 Pereira, T.C., Campos, M.M., and Bogo, M.R. (2016). Copper toxicology, oxidative  
576 stress and inflammation using zebrafish as experimental model. *Journal of applied*  
577 *toxicology : JAT* **36, 876-885.**
- 578 Popper, A.N., and Hoxter, B. (1984). Growth of a fish ear: 1. Quantitative analysis of  
579 hair cell and ganglion cell proliferation. *Hearing research* **15, 133-142.**
- 580 Raphael, Y. (1992). Evidence for supporting cell mitosis in response to acoustic

- 581 trauma in the avian inner ear. *J Neurocytol* **21**, 663-671.
- 582 Renshaw, S.A., and Trede, N.S. (2012). A model 450 million years in the making:  
583 zebrafish and vertebrate immunity. *Disease models & mechanisms* **5**, 38-47.
- 584 Roberson, D.W., Alosi, J.A., and Cotanche, D.A. (2004). Direct transdifferentiation  
585 gives rise to the earliest new hair cells in regenerating avian auditory epithelium.  
586 *Journal of Neuroscience Research* **78**, 461-471.
- 587 Romero-Carvajal, A., Navajas Acedo, J., Jiang, L., Kozlovskaja-Gumbriene, A.,  
588 Alexander, R., Li, H., and Piotrowski, T. (2015). Regeneration of Sensory Hair Cells  
589 Requires Localized Interactions between the Notch and Wnt Pathways. *Developmental*  
590 *cell* **34**, 267-282.
- 591 Rubbini, D., Robert-Moreno, A., Hoijman, E., and Alsina, B. (2015). Retinoic Acid  
592 Signaling Mediates Hair Cell Regeneration by Repressing p27kip and sox2 in  
593 Supporting Cells. *The Journal of neuroscience : the official journal of the Society for*  
594 *Neuroscience* **35**, 15752-15766.
- 595 Shimizu, N., Kawakami, K., and Ishitani, T. (2012). Visualization and exploration of  
596 Tcf/Lef function using a highly responsive Wnt/ $\beta$ -catenin signaling-reporter transgenic  
597 zebrafish. *Developmental Biology* **370**, 71-85.
- 598 Stone., J.S., and Rubel., E.W. (2000). Cellular studies of auditory hair cell  
599 regeneration in birds. *PNAS*.
- 600 Suli, A., Watson, G.M., Rubel, E.W., and Raible, D.W. (2012). Rheotaxis in Larval  
601 Zebrafish Is Mediated by Lateral Line Mechanosensory Hair Cells. *PloS one* **7**, e29727.
- 602 Thomas, E.D., Cruz, I.A., Hailey, D.W., and Raible, D.W. (2015). There and back again:  
603 development and regeneration of the zebrafish lateral line system. *Wiley Interdiscip Rev*  
604 *Dev Biol* **4**, 1-16.
- 605 Tian, L., Hires, S.A., and Looger, L.L. (2012). Imaging neuronal activity with  
606 genetically encoded calcium indicators. *Cold Spring Harbor protocols* **2012**, 647-656.
- 607 Yang, Y.X., Zheng, L.T., Shi, J.J., Gao, B., Chen, Y.K., Yang, H.C., Chen, H.L., Li, Y.C.,  
608 and Zhen, X.C. (2014). Synthesis of 5 $\alpha$ -cholestan-6-one derivatives and their  
609 inhibitory activities of NO production in activated microglia: discovery of a novel  
610 neuroinflammation inhibitor. *Bioorganic & medicinal chemistry letters* **24**, 1222-1227.
- 611 Yorgason., J.G., Fayad., J.N., and Kalinec., F. (2006). Understanding drug ototoxicity:  
612 molecular insights for prevention and clinical management. *Biological Reviews*.
- 613 Zhang, Q., Li, S., Wong, H.C., He, X.J., Beirl, A., Petralia, R.S., Wang, Y.X., and Kindt,  
614 K.S. (2018). Synaptically silent sensory hair cells in zebrafish are recruited after damage.  
615 *Nature communications* **9**, 1388.
- 616 Zhang, Q.X., He, X.J., Wong, H.C., and Kindt, K.S. (2016). Functional calcium  
617 imaging in zebrafish lateral-line hair cells. *Methods in cell biology* **133**, 229-252.
- 618
- 619
- 620

621           **Fig. 1 CuSO<sub>4</sub> damaged hair cells in lateral line of zebrafish.**  
622   **(A)** Lateral line hair cells in a 6 day post fertilization (dpf) AB/WT zebrafish  
623       larvae are labeled with 0.05% DASPEI. L2, LII3 and L3 neuromasts are  
624       marked with circles. Scale bar represents 500  $\mu$ m.  
625   **(B)** Lateral view of a neuromast shows sensory hair cells in the center labeled  
626       with DASPEI and a bundle of kinocilia (arrow) extend out of the periderm.  
627       Scale bar represents 50  $\mu$ m.  
628   **(C)** A cartoon illustrating the structure of the neuromast.  
629   **(D)** Time lapse imaging shows that when merged in 5  $\mu$ M CuSO<sub>4</sub> solution, hair  
630       cells were gradually injured and damaged within 60 min. Scale bar  
631       represents 10  $\mu$ m.  
632       **(E)** DASPEI staining displays that hair cells regenerate completely within  
633       96 hours post injured (hpi). Scale bar represents 10  $\mu$ m.  
634

635

636

637 **Fig. 2 BRS-28 reduces the number of neutrophils and macrophages**  
638 **migrating to the injured neuromasts.**

639 **(A-C)** Live imaging ( $\times 40$ ) displays the regions of L3 neuromasts of larvae  
640 at GFP channel, Dsred channel, and bright field (BF) channel and  
641 superimposed image in different group. Neutrophils (show both green and  
642 yellow fluorescence, indicated by white arrows) and macrophages (show only  
643 green fluorescence, indicated by blue arrows) around the neuromasts can be  
644 observed in Tg(*corola-eGFP*; *lyz-Dsred*) larvae. They are almost absent from  
645 the neuromasts in control **(A)**. Many neutrophils and macrophages migrate to  
646 injured neuromasts in  $\text{CuSO}_4$  group **(B)** while fewer neutrophils and  
647 macrophages migrate to injured neuromasts in BRS+ $\text{CuSO}_4$  group **(C)**. The  
648 image is captured after adding  $\text{CuSO}_4$  solution for 1 h. Scale bar represents 50  
649  $\mu\text{m}$ .

650 **(D-E)** Line charts reveal decreased numbers of neutrophils **(D)** and  
651 macrophages **(E)** within a radius of 50  $\mu\text{m}$  from the center of neuromasts at  
652 different time points after adding  $\text{CuSO}_4$  in BRS+ $\text{CuSO}_4$  group ( $n \geq 16$ ) than  
653  $\text{CuSO}_4$  group ( $n \geq 15$ ). Control ( $n \geq 11$ ) is observed at the same time points.

654 To **(D)** and **(E)**, comparisons were performed by using two-way ANOVA,  
655 with Tukey's multiple comparisons test. All Error bars show mean  $\pm$  S.E.M., \*\*\*  
656  $P < 0.001$ , \*\* $P < 0.01$ , \* $P < 0.05$ .

657

658

659

660 **Fig. 3 Suppressing inflammation delays hair cell regeneration.**

661 **(A)** Real-time imaging ( $\times 40$ ) displays regenerated hair cells in the  $\text{CuSO}_4$   
662 and BRS+ $\text{CuSO}_4$  group at 24, 48 and 96 hpi. Control group is taken at the  
663 same time point. Scale bar represents 10  $\mu\text{m}$ .

664 **(B)** The numbers of regenerated hair cells were significantly decreased in  
665 BRS+ $\text{CuSO}_4$  group than that in  $\text{CuSO}_4$  group at 16 ( $P=0.0061$ ), 24 ( $P=0.0021$ )  
666 and 48( $P<0.0001$ ) hpi. At 96 hpi, hair cells in both  $\text{CuSO}_4$  group and  
667 BRS+ $\text{CuSO}_4$  group regenerated to normal levels.

668 Linear analysis in  $\text{CuSO}_4$  group **(C)** and BRS+ $\text{CuSO}_4$  group **(D)** were  
669 conducted on the number of regeneration within 48 hours. The slope in  $\text{CuSO}_4$   
670 group (0.1879) is higher than that in BRS+ $\text{CuSO}_4$  group (0.148) and  
671 x-intercept in  $\text{CuSO}_4$  group (4.16) is higher than that in BRS+ $\text{CuSO}_4$  group  
672 (8.287).

673 **(E)** When delay the time window of inflammatory suppression, there is no  
674 delay in the regeneration of hair cells. BRS-28 was added at the same time as  
675  $\text{CuSO}_4$  ( $\text{CuSO}_4$ +BRS 0 h group), or 30 minutes after the addition of  $\text{CuSO}_4$   
676 ( $\text{CuSO}_4$ +BRS 0.5 h group), or 1 hour after the addition of  $\text{CuSO}_4$  ( $\text{CuSO}_4$ +BRS  
677 1 h group)( $n\geq 27$  neuromasts in each time point of each group).

678 To **(B)** and **(E)**, comparisons were performed by using two-way ANOVA,  
679 with Tukey's multiple comparisons test. All Error bars show mean  $\pm$  S.E.M., \*\*\*  
680  $P < 0.001$ , \*\* $P < 0.01$ , \* $P < 0.05$ .

681



682

683 **Fig.4 The recovery of the functional of lateral line system was**  
684 **delayed when inflammation was suppressed.**

685 **(A)** A U-shaped tank was designed to test the rheotaxis behavior of larvae.  
686 A peristaltic pump was used to form flow at the bottom of the tank. Larvae were  
687 placed from the right platform, and they sense the water flow from right to left.  
688 Rheotaxis perform was recorded by an infrared CCD.

689 A larva with excellent rheotaxis **(B)** and a larva with poor rheotaxis **(C)**  
690 were analyzed by behavioral analysis software. Moving traces were plotted in  
691 left panels and the motion vector were displayed in right panels. The lengths of  
692 the blue segments represented the distance of each movement, and the  
693 direction of the blue segment represented the direction of that movement. The  
694 length of the red line segment was the ratio of motion vectors sum to the  
695 motion arithmetic sum and the direction was the direction of the sum of the  
696 vectors.

697 **(D)** Rheotaxis score revealed that at 24 and 48 hpi, the rheotaxis of  
698 BRS+CuSO<sub>4</sub> group was significantly lower than that of control. On the contrary,  
699 the rheotaxis of CuSO<sub>4</sub> group was not significantly different from that of control  
700 within 24 hpi.

701 The speed **(E)** and distance **(F)** of larvae swimming at each time were  
702 consistent within different times and between different groups.

703 To **(D-F)**, comparisons were performed by using two-way ANOVA, with  
704 Tukey's multiple comparisons test. All Error bars show mean  $\pm$  S.E.M., \*\*P <  
705 0.01, \*P < 0.05.

706

707

708

709 **Fig.5 Calcium imaging revealed the function of a single neuromast**  
710 **after hair cell regeneration**

711 **(A)** Schematic diagram shows an electrode filled with fluid is located about  
712 100  $\mu\text{m}$  away from the top of kinocilia to stimulate the neuromast. The yellow  
713 and green hair cells represent different polarities.

714 **(B)** When stimulated by the flow, only a part of hair cells respond in this  
715 focal plane (circled cells), and some are far from this focal plane (dashed  
716 circled cells). The No. 2, 4, and 6 active hair cells (yellow circles) only respond  
717 to the flow in P-A direction **(C)**. At the same time, the No. 1, 3, and 5 active hair  
718 cells (green circles) only respond to the flow in A-P direction **(D)**. Scale bar in  
719 **(B)** represents 10  $\mu\text{m}$ .

720 **(E)** The fluorescence intensity ( $\Delta F/F$ ) of the BRS +  $\text{CuSO}_4$  group is  
721 significantly lower than that of the  $\text{CuSO}_4$  group in the Early Stage of  
722 regeneration (within 48 hpi) ( $P < 0.001$ ).

723 **(F)** The  $\Delta F/F$  of BRS+ $\text{CuSO}_4$  group is not significantly different from that  
724 of control group and  $\text{CuSO}_4$  group in the Late Stage of regeneration (72-96  
725 hpi)

726 **(G)** There is no difference in  $\Delta F/F$  between the BRS group and the control  
727 group.

728 **(H)** During the regeneration process, the number of active hair cells in  
729  $\text{CuSO}_4$  and BRS+ $\text{CuSO}_4$  group is basically the same, and did not increase  
730 with the total number of regenerated hair cells.

731 To **(E-H)**, comparisons were performed by using one-way ANOVA, with  
732 Tukey's multiple comparisons test.

733

734

735

736

737

738

739

740

741

742

**Supplementary Fig. 1 CuSO<sub>4</sub> caused apoptosis in hair cells.**

TUNEL assay revealed hair cells occurred apoptosis when treated with CuSO<sub>4</sub>. Nuclei were stained with DAPI. BF: Bright Field. Scale bar represents 20 μm.

743

744

**Supplementary Fig. 2 Tg(corola-eGFP; lyz-Dsred) transgenic line  
could mark both neutrophils and macrophages.**

745

746

747

748

749

This transgenic line expresses the enhanced green fluorescent protein (eGFP) in macrophages and expresses both eGFP and the enhanced red fluorescent protein (DsRed) in neutrophils, which shows yellow fluorescent when merged. Scale bar represents 200  $\mu$ m.

750

751

752

753

754 **Supplementary Fig. 3 Most active hair cells are polar in pairs and are**  
755 **sensitive to flow in the P-A direction.**

756  
757 **(A)** Most hair cells that responded to the flow in the opposite direction  
758 come in pairs.

759 **(B)** The fluorescence intensity of hair cells responding to P-A direction is  
760 significantly higher than that of hair cells responding to A-P direction.

761 To **(A,B)**, comparisons were performed by using one-way ANOVA, with  
762 Tukey's multiple comparisons test. All Error bars show mean  $\pm$  S.E.M.

763

764

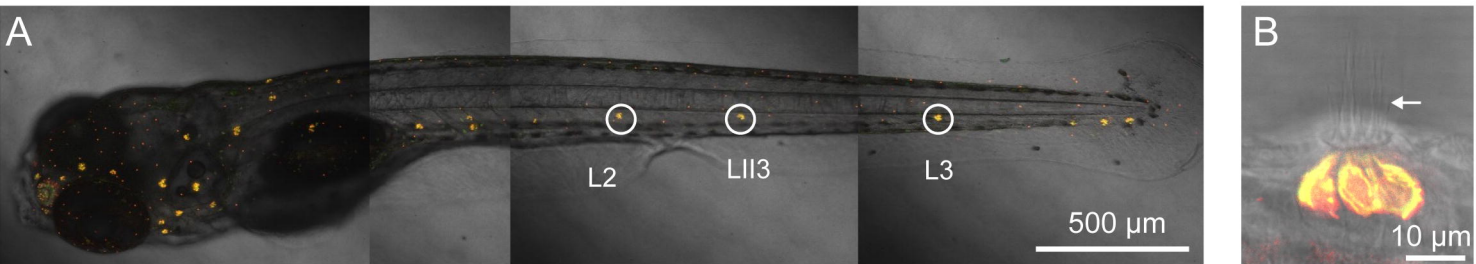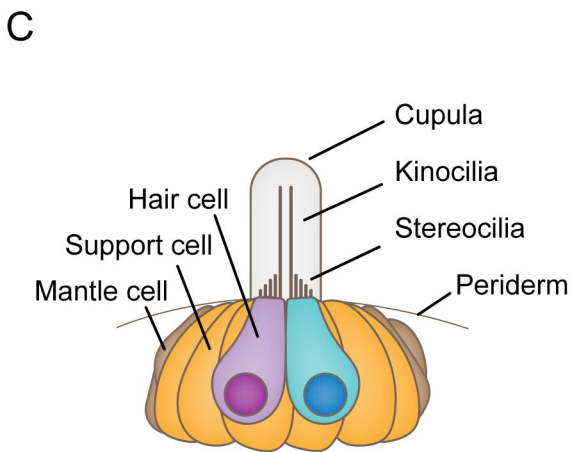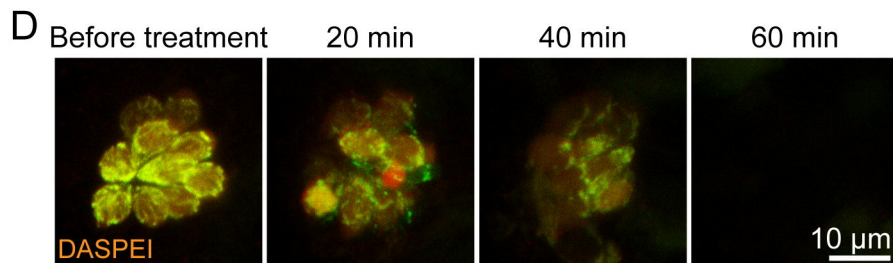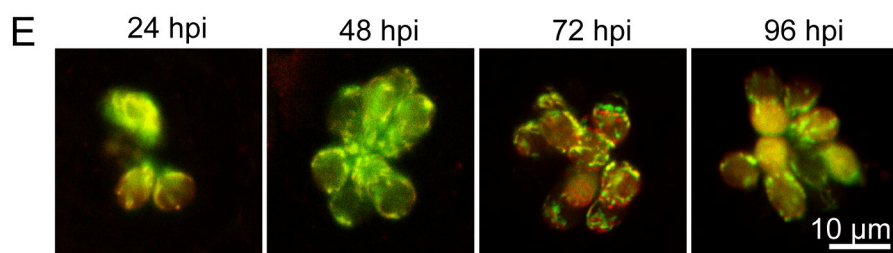

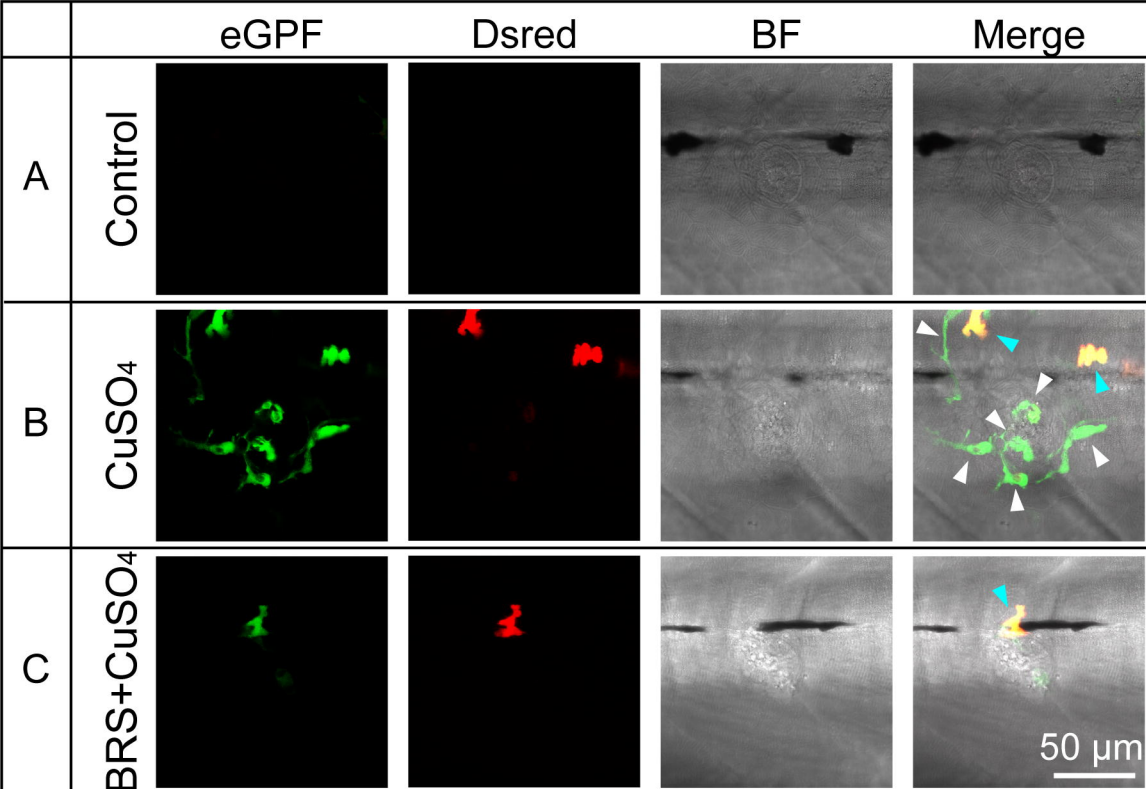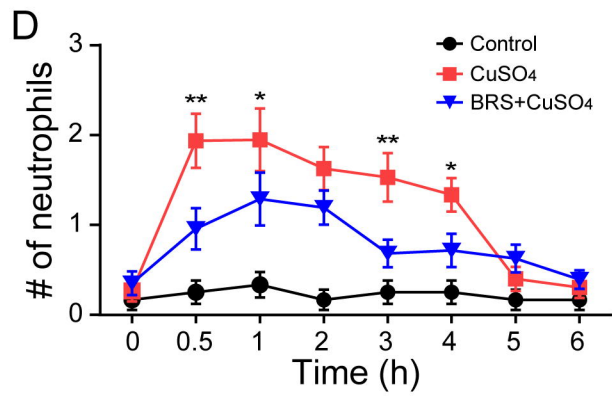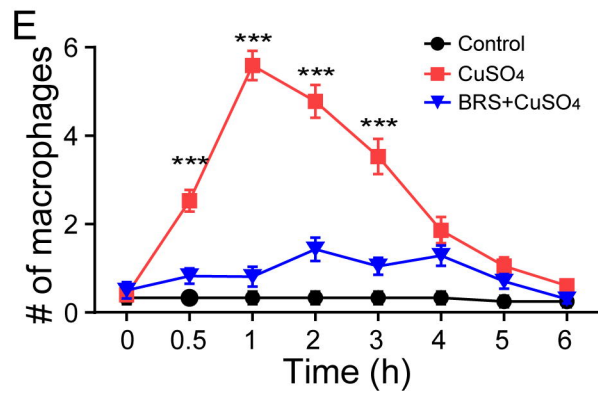

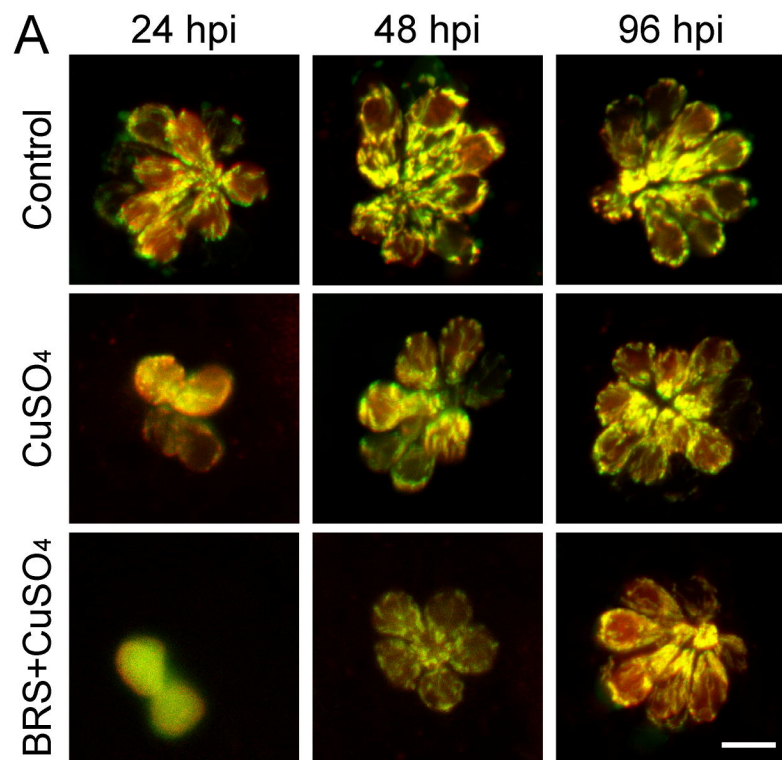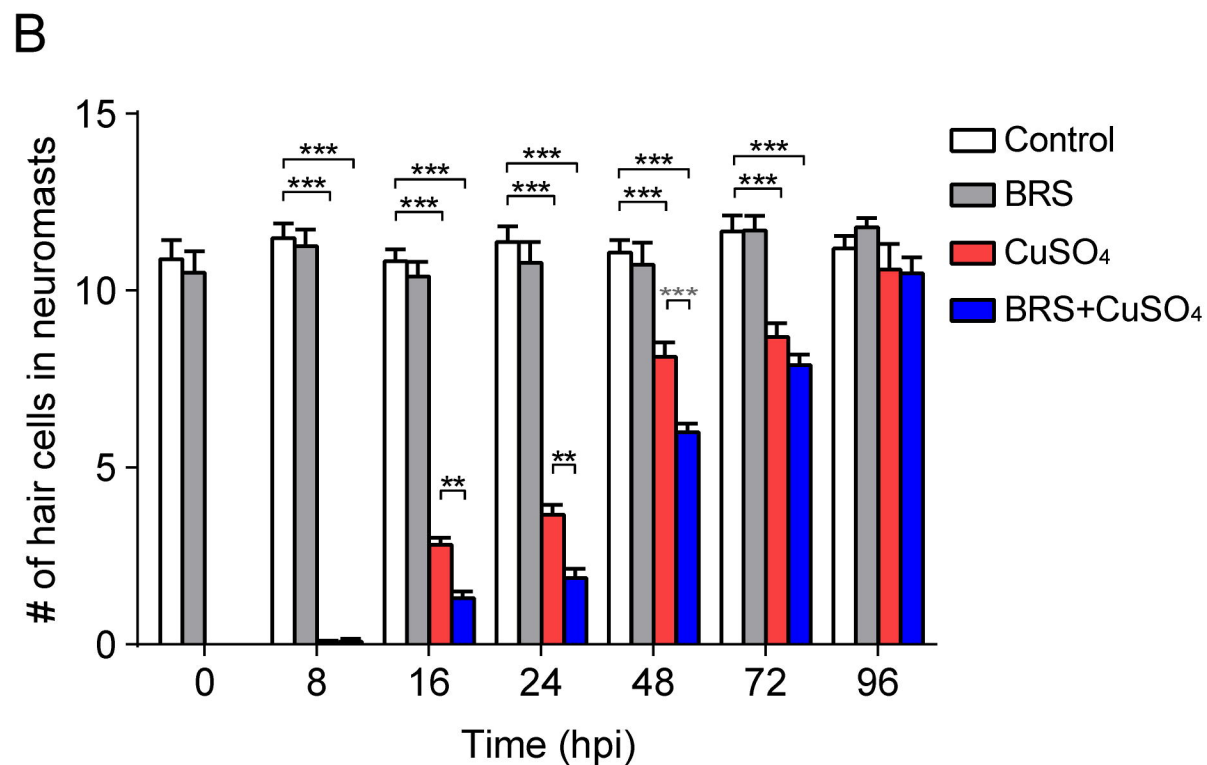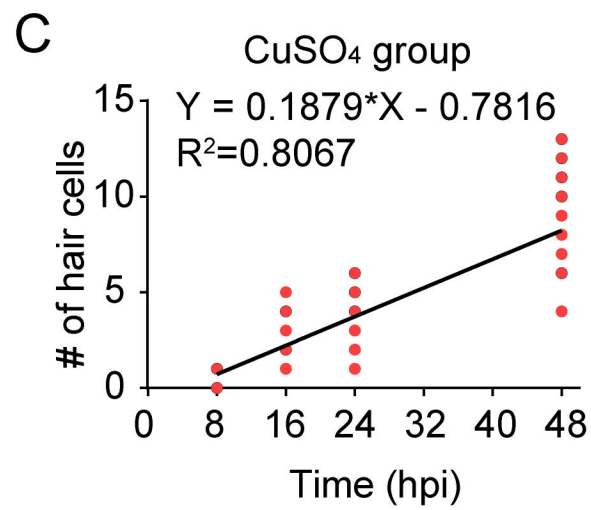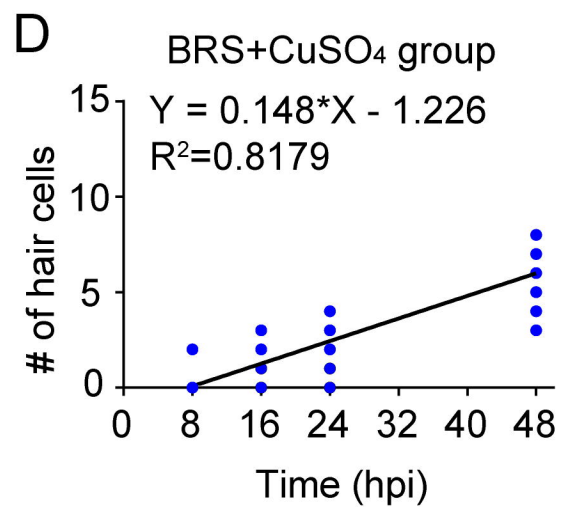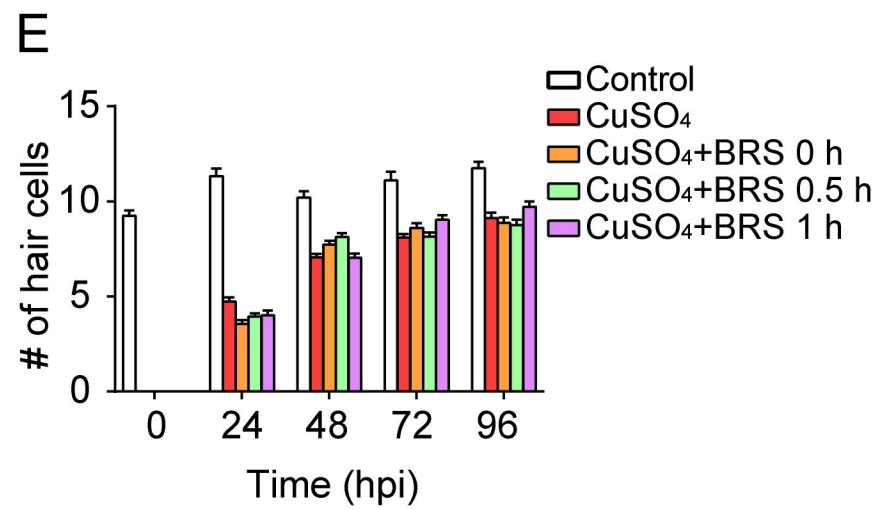



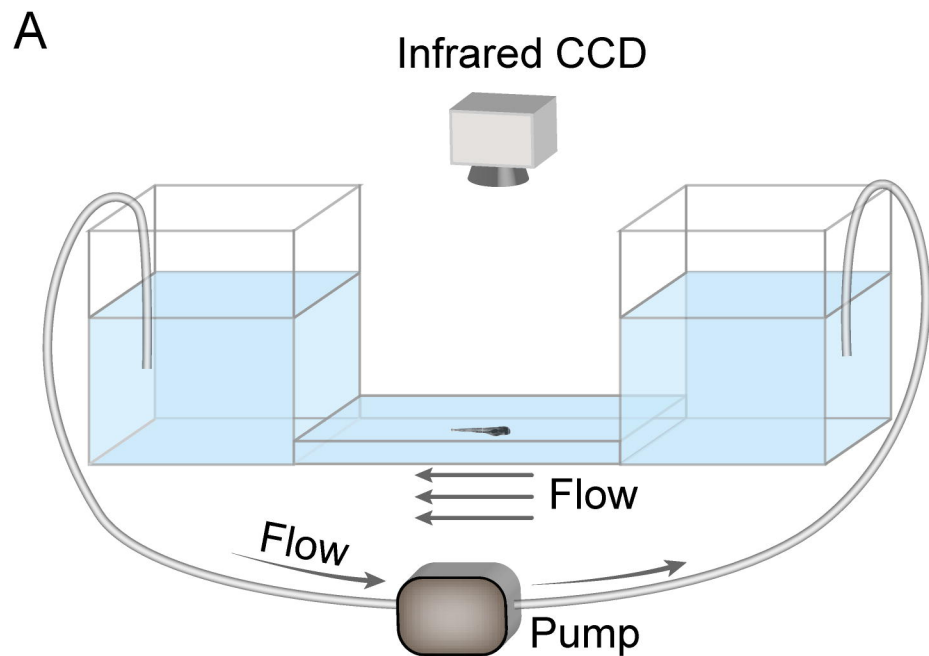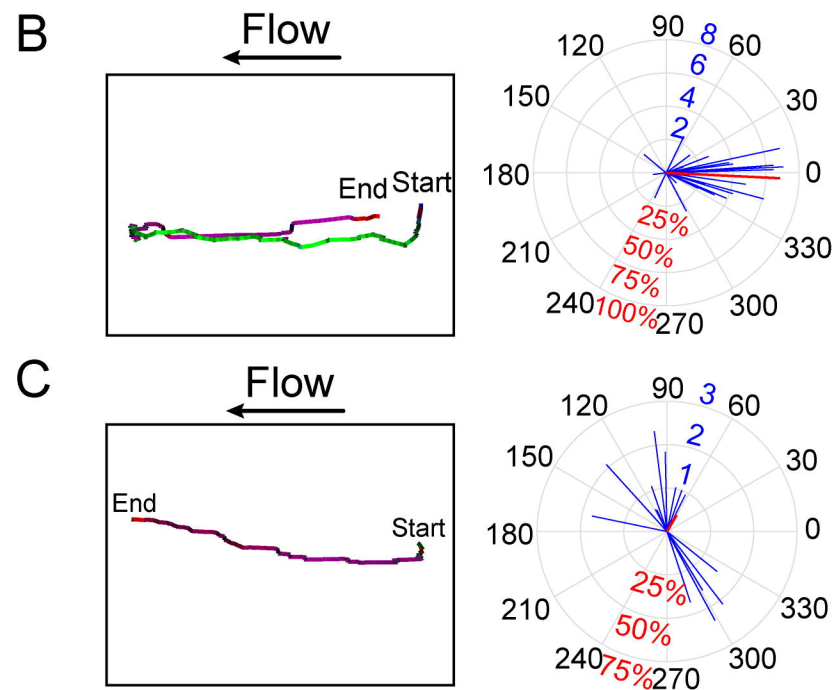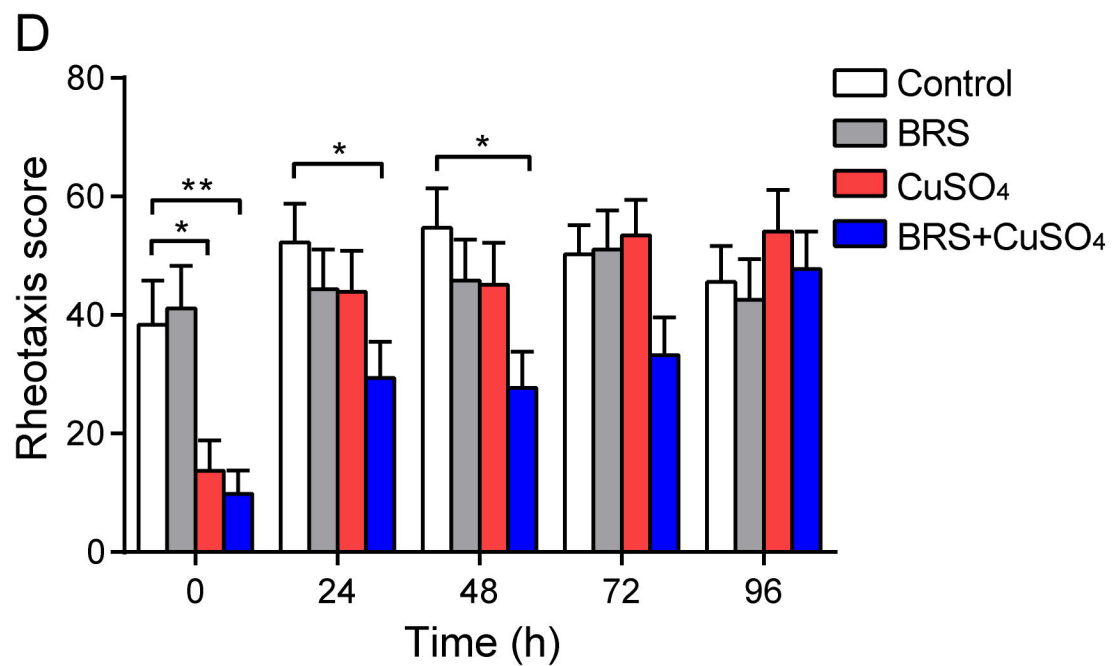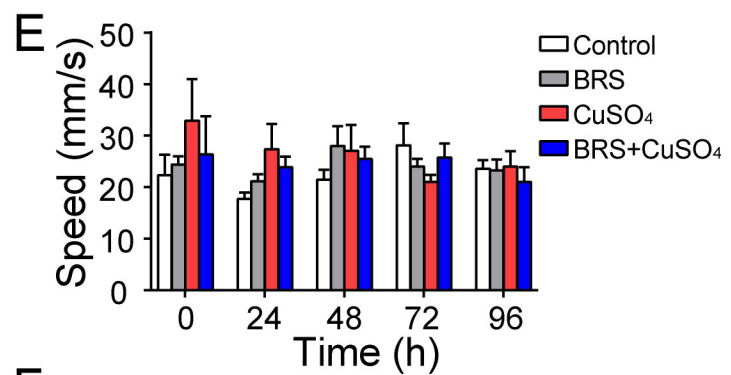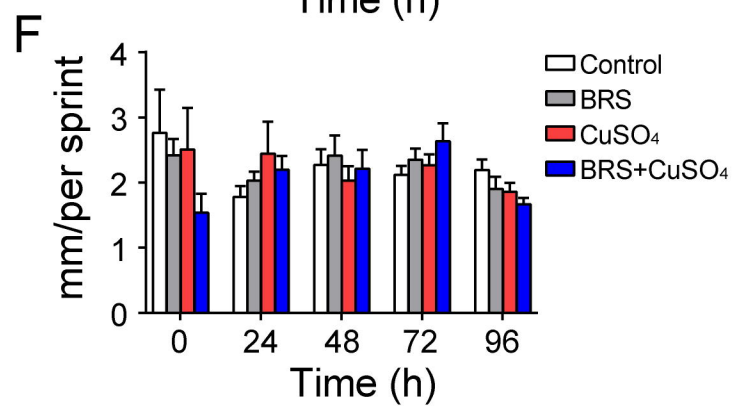

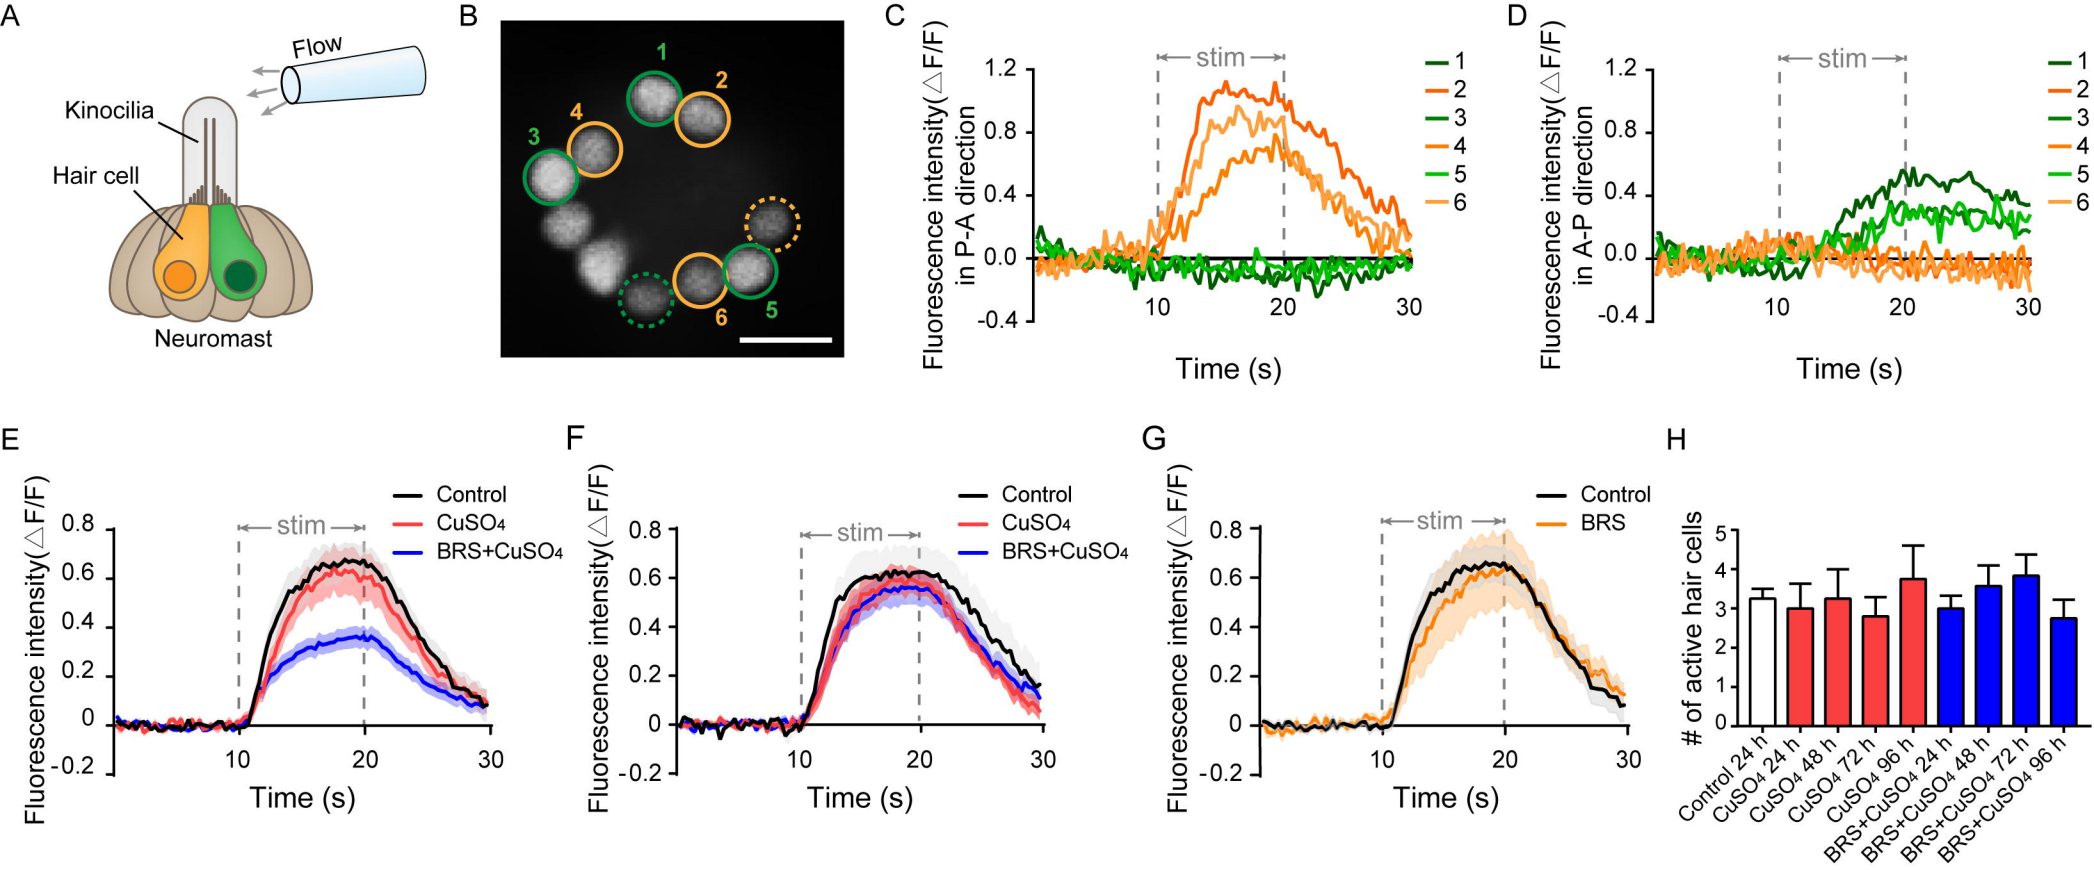

Source: http://biorxiv.org/content/10.1101/2020.02.26.962753v1.full.pdf
